# Supplementary material
Source: PubMed Central journal article supplement (PMC4152873)
Supplement: supp_114.058719_supplemental_table_58719.pdf [file supp_114.058719_supplemental_table_58719.pdf]

## Nicotine Pharmacokinetics in Rats is altered as a function of Age, impacting the Interpretation of Animal Model Data

Drug Metabolism and Disposition

### Supplemental Table 1.

#### Pharmacokinetic Parameters of Nicotine and Metabolites following Intravenous Nicotine

| Parameter <sup>a</sup>                      | NIC           |            | COT           |             | NNIC          |              | NNO         |             |
|---------------------------------------------|---------------|------------|---------------|-------------|---------------|--------------|-------------|-------------|
|                                             | EA            | AD         | EA            | AD          | EA            | AD           | EA          | AD          |
| <b>C<sub>max</sub> (ng/ml)</b>              | 44<br>(26)    | 69<br>(18) | 44**<br>(9.8) | 58<br>(12)  | 2.3*<br>(0.9) | 1.6<br>(0.9) | 12<br>(6.3) | 11<br>(1.2) |
| <b>t<sub>1/2</sub> (min)</b>                | 64            | 92         | 310           | 618         | 113           | 275          | 78          | 79          |
| <b>AUC<sub>(10min-4hr)</sub> (ng.hr/ml)</b> | 45***<br>(10) | 92<br>(12) | 141**<br>(17) | 191<br>(19) | 6.0<br>(1.9)  | 4.9<br>(1.3) | 25<br>(4.5) | 26<br>(4.0) |
| <b>AUC<sub>(2-8hr)</sub> (ng.hr/ml)</b>     | 13<br>(13)    | 41<br>(21) | 186**<br>(28) | 316<br>(34) | 5.3<br>(3.1)  | 5.2<br>(2.0) | 10<br>(5.5) | 14<br>(3.7) |
| <b>VD (L/kg)</b>                            | 5.0           | 3.2        |               |             |               |              |             |             |
| <b>CL (L.hr/kg)</b>                         | 3.3           | 1.4        |               |             |               |              |             |             |

<sup>a</sup> Mean (SD); NIC = Nicotine; COT = Cotinine; NNIC = Nornicotine; NNO = Nicotine-1'-N-oxide; EA = Early adolescent; AD = Adult. C<sub>max</sub> = Maximal metabolite concentration, t<sub>1/2</sub> = Terminal half-life, AUC = Area under the plasma concentration-time curve from 10 min to 4 hr and 2 to 8 hr, VD = Initial volume of distribution, CL = Clearance. \*p<0.05, \*\*p<0.01, \*\*\*p<0.001, significantly different from AD<sub>(iv)</sub> group.
